# Supplementary material
Source: HighWire-hosted journal article supplement (https://www.annfammed.org/highwire/filestream/8349/field_highwire_adjunct_files/1/Van_Vugt_Bronch_Supp_Table.pdf)
Supplement: Van_Vugt_Bronch_Supp_Table.pdf [file Van_Vugt_Bronch_Supp_Table.pdf]

**Online Supplementary Material**

van Vugt S, Broekhuizen L, Zuithoff N, et al. Airway obstruction and bronchodilator responsiveness in adults with acute cough. *Ann Fam Med*. 2012;10(6):523-529.

<http://www.annfammed.org/content/full/10/6/523>

| <b>Supplemental Table 1. Missing or Incomplete Spirometry Results per Country</b> |                                      |                                                             |
|-----------------------------------------------------------------------------------|--------------------------------------|-------------------------------------------------------------|
| <b>Country</b>                                                                    | <b>Eligible Participants<br/>No.</b> | <b>Missing or Incomplete Spirometry Results<br/>No. (%)</b> |
| Wales                                                                             | 193                                  | 68 (35)                                                     |
| UK                                                                                | 203                                  | 49 (24)                                                     |
| Netherlands                                                                       | 242                                  | 39 (16)                                                     |
| Spain                                                                             | 488                                  | 100 (21)                                                    |
| Germany                                                                           | 159                                  | 22 (14)                                                     |
| Belgium                                                                           | 300                                  | 90 (30)                                                     |
| Poland                                                                            | 555                                  | 84 (15)                                                     |
| Italy                                                                             | 68                                   | 63 (93)                                                     |
| Sweden                                                                            | 87                                   | 8 (9)                                                       |
| Slovakia                                                                          | 143                                  | 55 (39)                                                     |
| France                                                                            | 23                                   | 0 (0)                                                       |
| Slovenia                                                                          | 71                                   | 7 (10)                                                      |
| Total                                                                             | 2,532                                | 585 <sup>a</sup>                                            |

<sup>a</sup> Excluded from the present analysis.
